# Supplementary material
Source: ML conference proceedings conference paper supplement (https://openreview.net/forum?id=RGmDtMs9w7)
Supplement: supplementary_material [file readme.pdf › code/readme.pdf]

This folder contains the source code for all experiments presented in our paper.

- **Evaluation of noisy regularized SGD:** This subfolder contains three files, each corresponding to the implementation of noisy regularized SGD for solving one of the three equations discussed in the paper under the PINN framework.
- **Experiment 2:** This subfolder provides the code for Experiment 2 in the main text. Separate scripts are included, each corresponding to a different step size setting used in this experiment.
- **Other files:** All other files are named according to their experiment numbers and correspond directly to the experiments described in the paper.

This organization is intended to make it straightforward for readers to reproduce and verify our results.
